# Supplementary material for: A unique uranyl framework containing uranyl pentamers as secondary building units: synthesis, structure, and spectroscopic properties
Source: Royal Society of Chemistry journal article supplement (doi:10.1039/c9dt03871j), 2019-12-02
Supplement: c9dt03871j1.pdf [file c9dt03871j1.pdf]

Supporting information for

**A unique uranyl framework containing uranyl pentamers as secondary building units: synthesis, structure, and spectroscopic properties**

Yugang Zhang<sup>a+</sup>, Lanhua Chen<sup>a+</sup>, Jingwen Guan<sup>a</sup>, Xia Wang<sup>a</sup>, Shuao Wang<sup>a</sup>, and Juan Diwu<sup>\*a</sup>

<sup>a</sup>State Key Laboratory of Radiation Medicine and Protection, School for Radiological and interdisciplinary Sciences (RAD-X) and Collaborative Innovation Centre of Radiation Medicine of Jiangsu Higher Education Institutions, Soochow University, Suzhou 215123, China

E-mail: diwujuan@suda.edu.cn

## **Table of Contents**

### **S1 Experimental section**

### **S2 X-ray crystallography studies**

### **S3 Characterization**

### **S4 Tables**

**Table S1 The crystallographic data of compound 1**

**Table S2 Element analysis result of compound 1**

**Table S3 The crystallographic data of compound 2**

**Table S4 Element analysis result of compound 2**

### **S5 Figures**

**Fig. S1 Thermal-gravimetric analysis data of compound 1**

**Fig. S2 FT-IR spectrum**

**Fig. S3 Thermal-gravimetric analysis data of compound 2**

**Fig. S4 pH stability measurement results of compound 1**

**Fig. S5 pH stability measurement results of compound 2**

## S1 Experimental section

*Caution ! While all uranium compounds used in these studies contained depleted uranium, standard precautions were performed for handling radioactive material, and all studies were conducted in a laboratory dedicated to studies on actinide elements.*

*Materials:*  $\text{UO}_2(\text{NO}_3)_2 \cdot 6\text{H}_2\text{O}$ , 1,2,4-Benzenetricarboxylic acid (98%, TCI), Tetrahydrofuran (AR, Adamasbeta), N,N-Dimethylformamide (AR, Adamasbeta), Tetraethylammonium (TEA) hydroxide (35 wt% solution in water, TCI), Formic acid (AR, Adamasbeta). All chemical reagents and solvents purchased from commercial suppliers and directly used as received.

*Synthesis of **compound 1**:* the mixture of  $\text{UO}_2(\text{NO}_3)_2 \cdot 6\text{H}_2\text{O}$  (100.4 mg, 0.2 mmol), 1,2,4-Benzenetricarboxylic acid (63 mg, 0.3 mmol),  $\text{H}_2\text{O}$  (2 mL), THF (2 mL), and DMF (2 mL) was added into a 20 mL stainless steel PTFE vial. The vial was heated to 130 °C, maintained for 3 days, and then cooled to room temperature at a rate of 5 °C/h. Dark yellow crystals were finally obtained as a pure phase. The yield of **compound 1** is about 15% based on uranium.

*Synthesis of **compound 2**:* the mixture of  $\text{UO}_2(\text{NO}_3)_2 \cdot 6\text{H}_2\text{O}$  (50.2 mg, 0.1 mmol), 1,2,4-Benzenetricarboxylic acid (42 mg, 0.2 mmol), Tetraethylammonium hydroxide (100  $\mu\text{L}$ ), formic acid (50  $\mu\text{L}$ ), and  $\text{H}_2\text{O}$  (2 mL) was added into a 20 mL stainless steel PTFE vial. The vial was

heated to 160 °C, maintained for 4 days, and then cooled to room temperature at a rate of 5 °C/h. Yellow crystals were finally obtained as a pure phase. The yield of **compound 2** is about 52% based on uranium.

## **S2 X-ray Crystallography Studies:**

Single crystal X-ray diffraction data collections of **compound 1** and **compound 2** were performed on a Bruker D8-Venture diffractometer with a Turbo X-ray Source (Mo–K $\alpha$  radiation,  $\lambda = 0.71073 \text{ \AA}$ ) adopting the direct-drive rotating anode technique and a CMOS detector under 298 K. The data of **compound 1** and **compound 2** were collected using the program APEX3 and then processed using SAINT routine in APEX3. The structure of **compound 1** and **compound 2** were solved by direct methods and refined by the full-matrix least squares on  $F^2$  using the SHELXTL.<sup>[1]</sup>

## **S3 Characterizations**

*Instrumentations:* Powder X-ray diffraction (PXRD) patterns were collected from 5° to 50° with a step of 0.02° on a Bruker D8 Advance diffractometer with Cu K $\alpha$  radiation ( $\lambda = 1.54056 \text{ \AA}$ ) and a Lynxeye one-dimensional detector. Elemental analysis (C, N, and H) were performed using a Vario EL CHNOS elemental analyzer. The FT-IR spectrum of **compound 1** without KBr were recorded in the range of 4000-400  $\text{cm}^{-1}$

on a Thermo Nicolet iS50 spectrometer. Thermogravimetric analyses were carried out on a NETZSCH STA449F3 instrument in the range of 30-900 °C under a nitrogen flow at a heating rate of 10 K/min for the dried samples of **compound 1** and **compound 2**. Luminescence spectra were collected on a Craic Technologies microspectrophotometer and accessory instrument. Second Harmonic Generation (SHG) signals were recorded on a Kurtz-Perry powder SHG test with an Nd:YAG laser (1064 nm).  $\text{KH}_2\text{PO}_4$  was chosen as a reference substance to the signal of **compound 1**.

*Hydrolytic Stability Measurements:* Hydrolytic stability measurements for **compound 1** and **compound 2** were carried out by stirring the samples in aqueous solutions at various pH range from 5 to 12 for 1 day. The solid samples were then collected and dried for PXRD patterns analysis.

**Table S1 The crystallographic data of compound 1**Table S1. Crystallographic data of **compound 1**.

|                                                                                                               |                                                                                                                                                                                                                                                   |
|---------------------------------------------------------------------------------------------------------------|---------------------------------------------------------------------------------------------------------------------------------------------------------------------------------------------------------------------------------------------------|
| Formula                                                                                                       | [DMPD][H <sub>3</sub> O]<br>[(CH <sub>3</sub> ) <sub>2</sub> NH <sub>2</sub> ] <sub>2</sub> [(UO <sub>2</sub> ) <sub>5</sub> O <sub>3</sub> (OH)(HCOO)<br>(C <sub>9</sub> H <sub>3</sub> O <sub>6</sub> ) <sub>2</sub> ]·(DMF) (H <sub>2</sub> O) |
| <i>Mr</i> [g mol <sup>-1</sup> ]                                                                              | 2174.00                                                                                                                                                                                                                                           |
| Crystal system                                                                                                | Monoclinic                                                                                                                                                                                                                                        |
| Space group                                                                                                   | <i>Cc</i>                                                                                                                                                                                                                                         |
| <i>a</i> (Å)                                                                                                  | 25.3322(19)                                                                                                                                                                                                                                       |
| <i>b</i> (Å)                                                                                                  | 8.8310(7)                                                                                                                                                                                                                                         |
| <i>c</i> (Å)                                                                                                  | 25.293(3)                                                                                                                                                                                                                                         |
| $\alpha$ (°)                                                                                                  | 90                                                                                                                                                                                                                                                |
| $\beta$ (°)                                                                                                   | 118.825(2)                                                                                                                                                                                                                                        |
| $\gamma$ (°)                                                                                                  | 90                                                                                                                                                                                                                                                |
| <i>V</i> (Å <sup>3</sup> )                                                                                    | 4957.2(8)                                                                                                                                                                                                                                         |
| <i>Z</i>                                                                                                      | 4                                                                                                                                                                                                                                                 |
| $\rho_{\text{calcd}}$ (g cm <sup>-3</sup> )                                                                   | 2.791                                                                                                                                                                                                                                             |
| <i>M</i> (mm <sup>-1</sup> )                                                                                  | 16.371                                                                                                                                                                                                                                            |
| <i>F</i> (000)                                                                                                | 3668                                                                                                                                                                                                                                              |
| <i>T</i> (K)                                                                                                  | 298                                                                                                                                                                                                                                               |
| <i>R</i> <sub>1</sub> <sup>a</sup> , <i>wR</i> <sub>2</sub> <sup>b</sup> ( <i>I</i> >2 $\sigma$ ( <i>I</i> )) | 0.0305, 0.0706                                                                                                                                                                                                                                    |
| <i>R</i> <sub>1</sub> <sup>a</sup> , <i>wR</i> <sub>2</sub> <sup>b</sup> (all data)                           | 0.0343, 0.0729                                                                                                                                                                                                                                    |

$$^aR_1 = \frac{\sum ||F_o| - |F_c||}{\sum |F_o|}, \quad ^b wR_2 = \left[ \frac{\sum w(F_o^2 - F_c^2)^2}{\sum w(F_o^2)^2} \right]^{1/2}$$

---

### **Table S2 Element analysis result of compound 1**

Table S2. The element analysis result of **compound 1**

| <b>Name</b>       | <b>Weight (mg)</b> | <b>Content (%)</b> | <b>Peak Area</b> | <b>Daily Factor</b> | <b>The theoretical content based on formula (%)</b> |
|-------------------|--------------------|--------------------|------------------|---------------------|-----------------------------------------------------|
| <b>Compound 1</b> | 2.7710             | N:2.546            | 2678             | 0.9915              | 2.569                                               |
|                   |                    | C:17.13            | 12918            | 0.9918              | 17.62                                               |
|                   |                    | H:2.526            | 4908             | 1.0587              | 2.478                                               |

### **Table S3 The crystallographic data of compound 2**

Table S3. The crystallographic data of **compound 2**

| Formula                                                                                              | (TEA) <sub>2</sub> [(UO <sub>2</sub> ) <sub>2</sub> (H <sub>2</sub> O)(C <sub>9</sub> H <sub>3</sub> O <sub>6</sub> ) <sub>2</sub> ]·5(H <sub>2</sub> O) |
|------------------------------------------------------------------------------------------------------|----------------------------------------------------------------------------------------------------------------------------------------------------------|
| <i>Mr</i> [g mol <sup>-1</sup> ]                                                                     | 1322                                                                                                                                                     |
| Crystal system                                                                                       | monoclinic                                                                                                                                               |
| Space group                                                                                          | <i>P2<sub>1</sub>/n</i>                                                                                                                                  |
| <i>a</i> (Å)                                                                                         | 9.8823(13)                                                                                                                                               |
| <i>b</i> (Å)                                                                                         | 15.971(2)                                                                                                                                                |
| <i>c</i> (Å)                                                                                         | 27.569(3)                                                                                                                                                |
| $\alpha$ (°)                                                                                         | 90                                                                                                                                                       |
| $\beta$ (°)                                                                                          | 91.413(4)                                                                                                                                                |
| $\gamma$ (°)                                                                                         | 90                                                                                                                                                       |
| <i>V</i> (Å <sup>3</sup> )                                                                           | 4349.9(9)                                                                                                                                                |
| <i>Z</i>                                                                                             | 4                                                                                                                                                        |
| $\rho_{\text{calcd}}$ (g cm <sup>-3</sup> )                                                          | 1.878                                                                                                                                                    |
| <i>M</i> (mm <sup>-1</sup> )                                                                         | 7.505                                                                                                                                                    |
| F(000)                                                                                               | 2332                                                                                                                                                     |
| T(K)                                                                                                 | 298                                                                                                                                                      |
| <i>R</i> <sub>1</sub> <sup>a</sup> , <i>wR</i> <sub>2</sub> <sup>b</sup> ( <i>I</i> >2σ( <i>I</i> )) | 0.0371, 0.1434                                                                                                                                           |
| <i>R</i> <sub>1</sub> <sup>a</sup> , <i>wR</i> <sub>2</sub> <sup>b</sup> (all data)                  | 0.0424, 0.1473                                                                                                                                           |

$$^aR_1 = \frac{\sum ||F_o| - |F_c||}{\sum |F_o|}, \quad ^b wR_2 = \left[ \frac{\sum w(F_o^2 - F_c^2)^2}{\sum w(F_o^2)^2} \right]^{1/2}$$

---

**Table S4 Element analysis result of compound 2**



Table S4. The element analysis result of **compound 1**

| <b>Name</b>       | <b>Weight (mg)</b> | <b>Content (%)</b> | <b>Peak Area</b> | <b>Daily Factor</b> | <b>The theoretical content based on formula (%)</b> |
|-------------------|--------------------|--------------------|------------------|---------------------|-----------------------------------------------------|
| <b>Compound 2</b> | 2.5730             | N:2.513            | 1570             | 0.9915              | 2.121                                               |
|                   |                    | C:32.35            | 13124            | 0.9918              | 30.91                                               |
|                   |                    | H:4.670            | 7450             | 1.0587              | 4.546                                               |

**Fig. S1 Thermal-gravimetric analysis (TGA) data of compound 1**

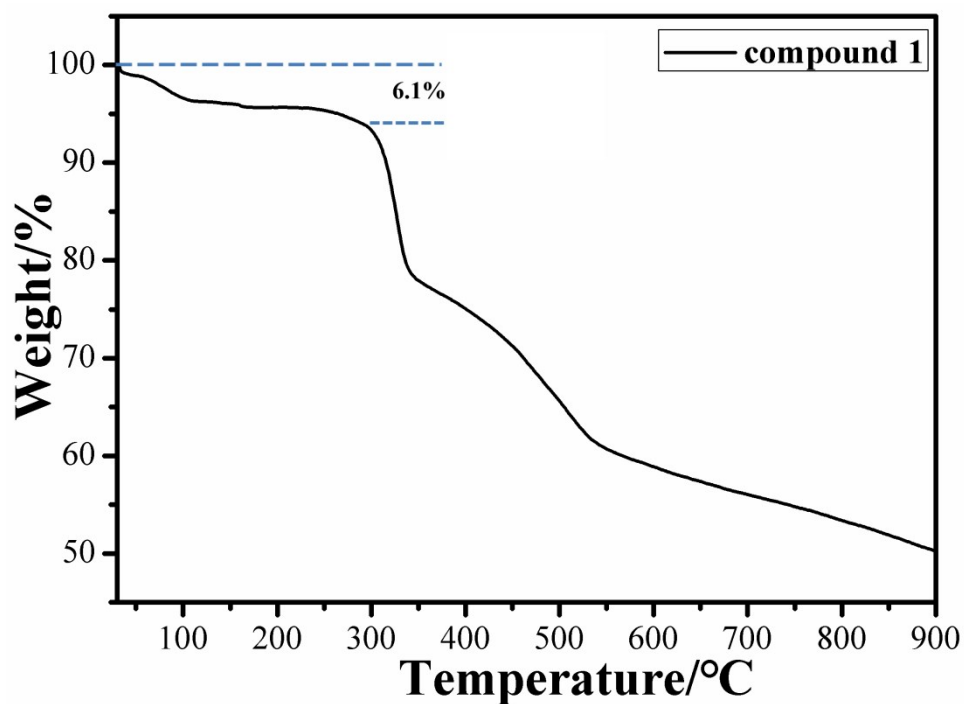

**Fig. S1.** The Thermal-gravimetric analysis curve of **compound 1**

**Fig. S2 FT-IR spectrum**

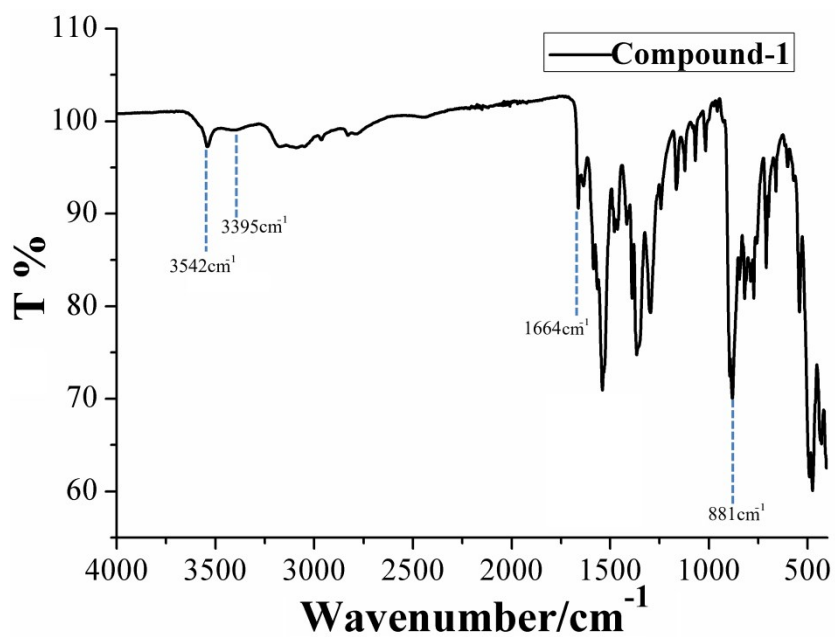

**Fig. S2.** FT-IR spectrum of **compound 1**

**Fig. S3 Thermal-gravimetric analysis (TGA) data of compound 2**

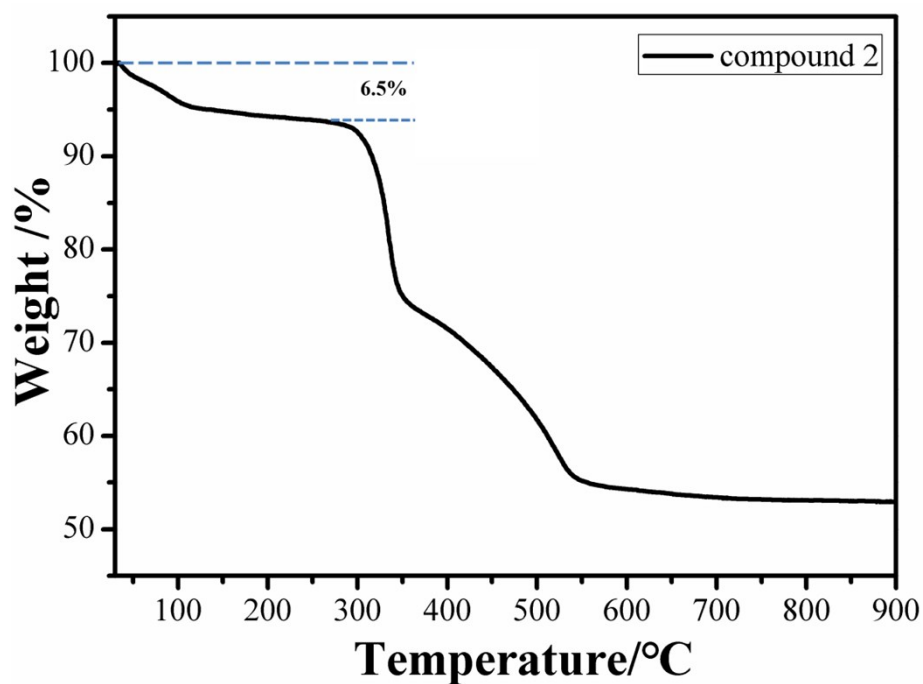

**Fig. S3.** The Thermal-gravimetric analysis curve of **compound 2**

**Fig. S4 pH stability measurement results of compound 1**

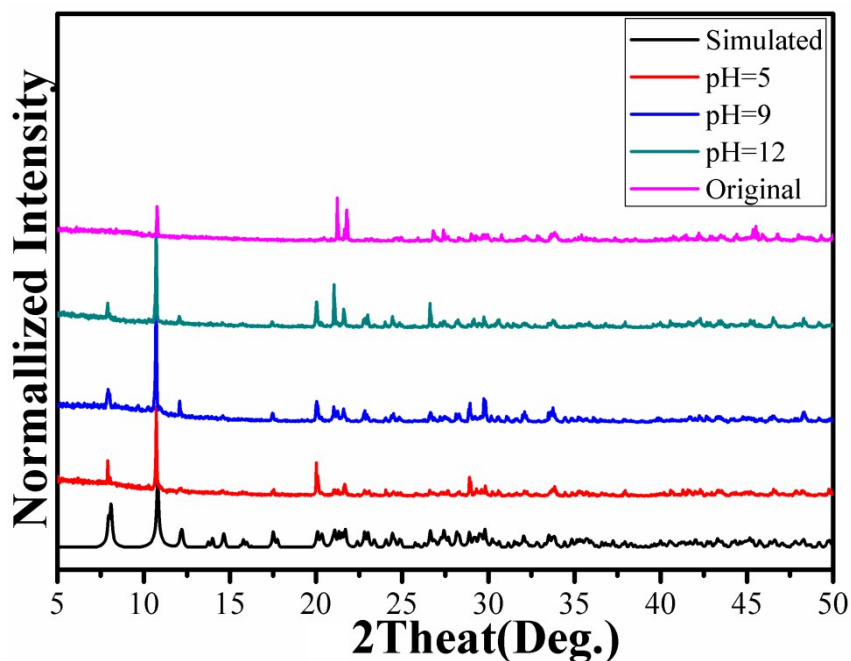

**Fig. S4.** The Powder X-ray diffraction (PXRD) patterns for solid samples of **compound 1** after soaking in solutions with pH ranging from 5 to 12

**Fig. S5** pH stability measurement results of compound 2

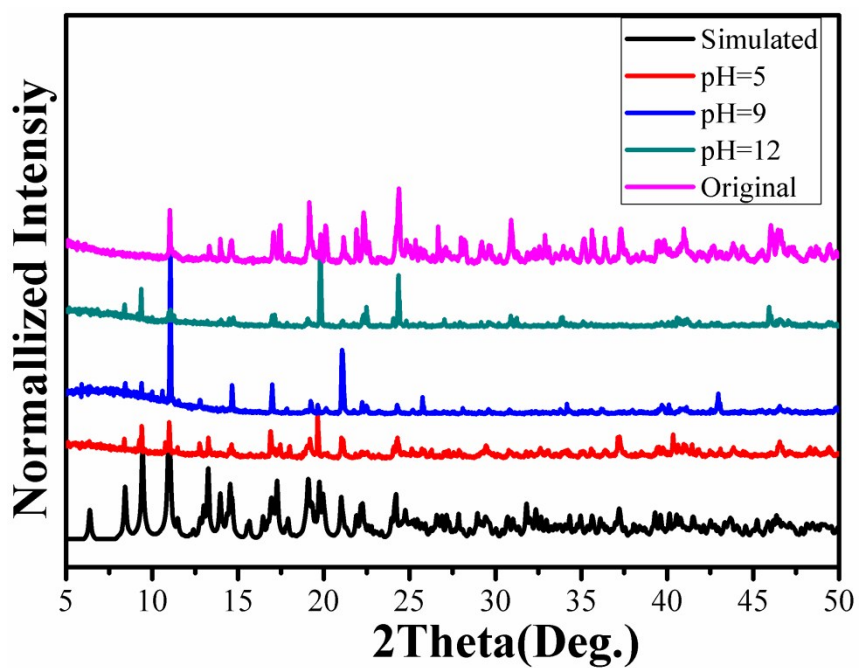

**Fig. S5.** The powder X-ray diffraction (PXRD) patterns for solid samples of **compound 2** after soaking in solutions with pH ranging from 5 to 12.

**Reference:**

- [1]. G. Sheldrick, P. SHELXTL, *Madison, WI* 1990.
